# Supplementary material for: Adeno-associated virus serotype 2 induces cell-mediated immune responses directed against multiple epitopes of the capsid protein VP1
Source: PubMed Central journal article supplement (PMC2885037; doi:10.1099/vir.0.014175-0), 2009-11
Supplement: supp_90_11_2622__1.pdf [file supp_90_11_2622__1.pdf]

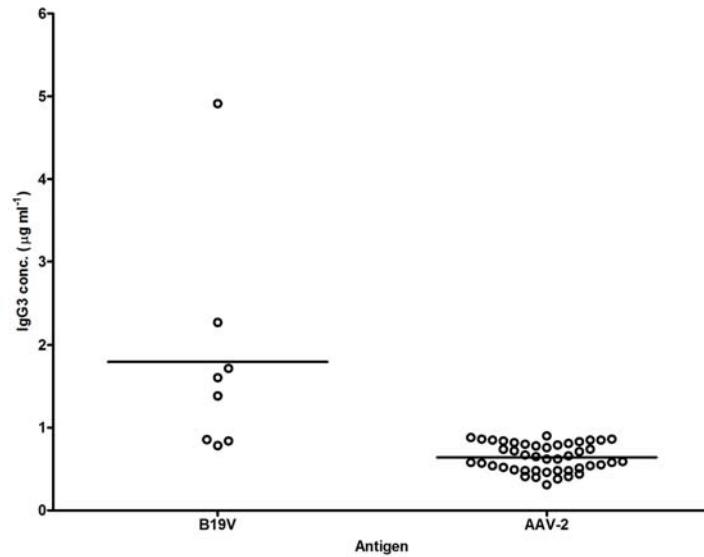

**Supplementary Fig. S1.** Verification of the capacity of the IgG subclass ELISA protocol to successfully detect antigen-bound IgG3. AAV-2 specific IgG3 levels determined in plasma from healthy humans ( $n = 41$ ) are as previously shown (Fig. 2c of the main paper). IgG3 specific for the VP2 capsid protein ( $2 \mu\text{g ml}^{-1}$ ) of Parvovirus B19 (B19V) was detected in sera from known B19V-positive humans ( $n = 8$ ) using the same detection reagents as used in Fig. 2(c) of the main paper.
